# Supplementary material for: Enhancing the catalytic activity of Pt nanoparticles using poly sodium styrene sulfonate stabilized graphene supports for methanol oxidation
Source: Royal Society of Chemistry journal article supplement (doi:10.1039/c2ta00619g), 2013-01-01
Supplement: c2ta00619g.pdf [file c2ta00619g.pdf]

## Supporting Information

### Enhancing the catalytic activity of Pt NPs using poly sodium styrene sulfonate stabilized graphene support for methanol oxidation

Sundar Mayavan<sup>a</sup>, Hyung-Sik Jang<sup>a</sup>, Min-Jae Lee<sup>a</sup>, Sun Hee Choi<sup>b</sup> and Sung-Min Choi<sup>a\*</sup>

<sup>a</sup> Department of Nuclear and Quantum Engineering, Korea Advanced Institute of Science and Technology, Daejeon, 305-701, Republic of Korea

<sup>b</sup> Pohang Accelerator Laboratory, Pohang University of Science and Technology (POSTECH), Pohang 790-784, Republic of Korea.

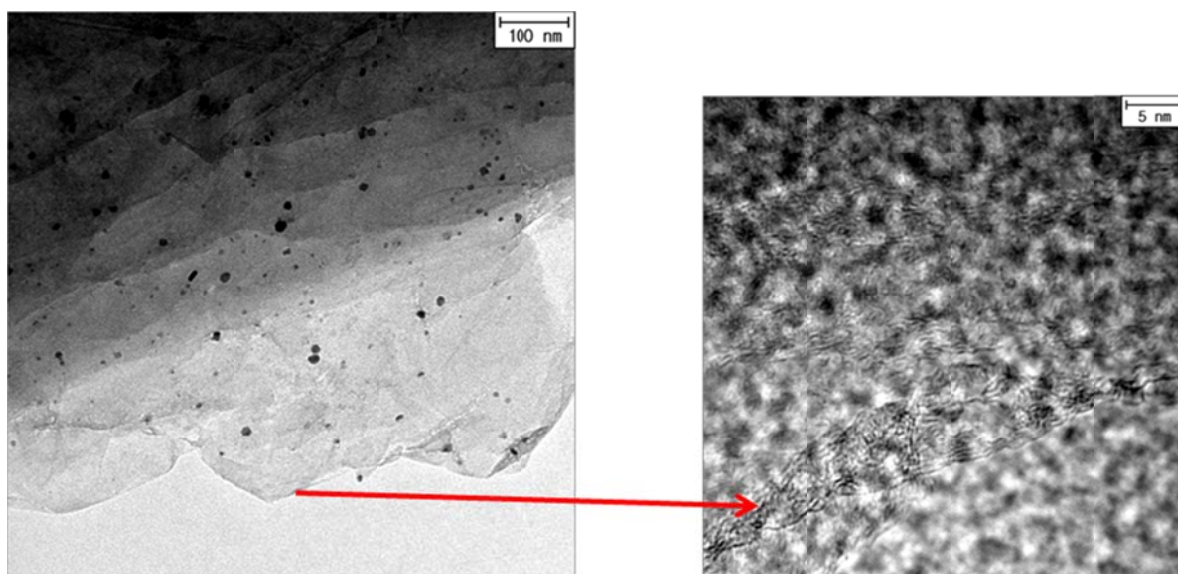

**Figure S1** Few layer graphene sheets

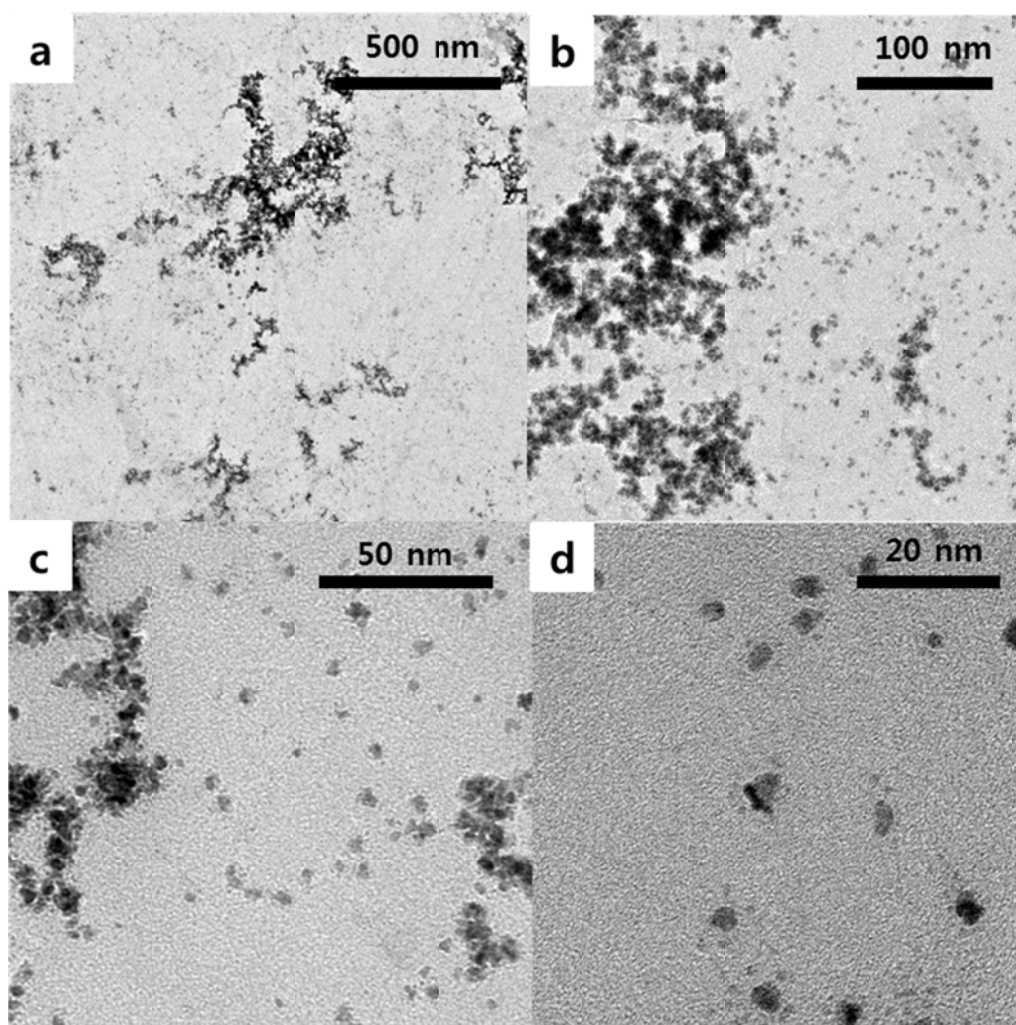

**Figure S2** TEM images of Pt-G

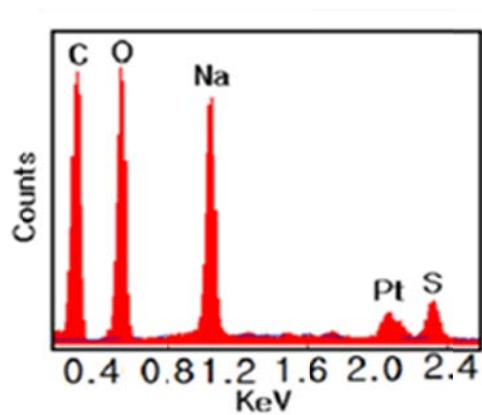

**Figure S3** EDX profile of Pt-PSS-G

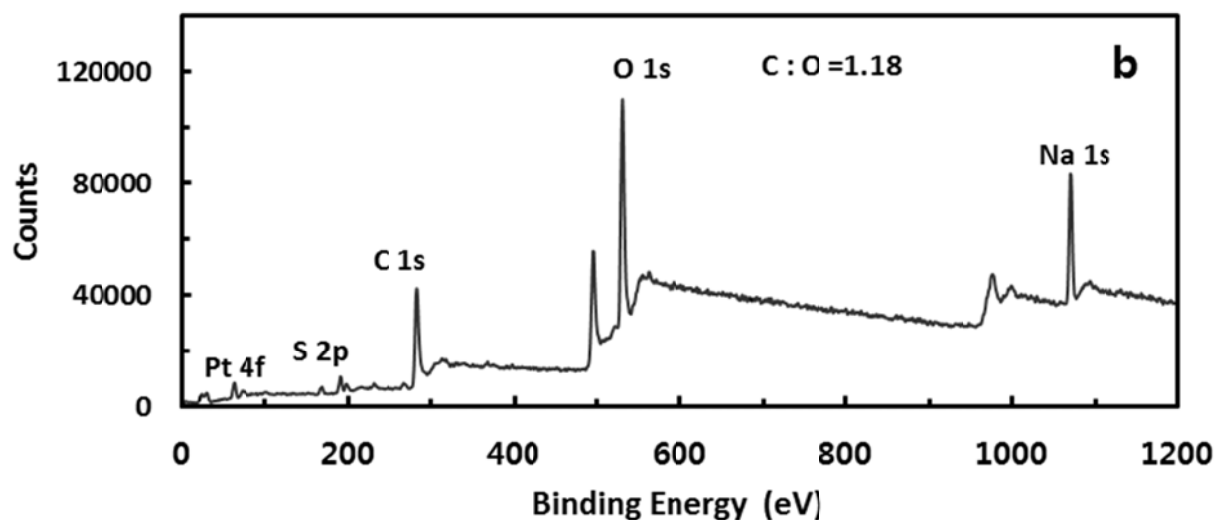

**Figure S4** XPS spectra of Pt-PSS-G

**Table S1** White line (WL) area at the Pt L<sub>3</sub>-edge for Pt NPs on PSS-G

|          | WL area(eV)  | R-factor <sup>a</sup> |
|----------|--------------|-----------------------|
| Pt foil  | 5.247(0.097) | 0.00012               |
| Pt-PSS-G | 6.831(0.099) | 0.00012               |

<sup>a</sup> a measure of absolute misfit between data and theory  
The number in parentheses denotes an uncertainty of the calculated parameter.
